# Supplementary material for: A Multiplex CRISPR-Screen Identifies PLA2G4A as Prognostic Marker and Druggable Target for HOXA9 and MEIS1 Dependent AML
Source: MDPI journal article supplement (doi:10.3390/ijms22179411), 2021-08-30
Supplement: s1 [file s1]

## Supplementary Figure S1

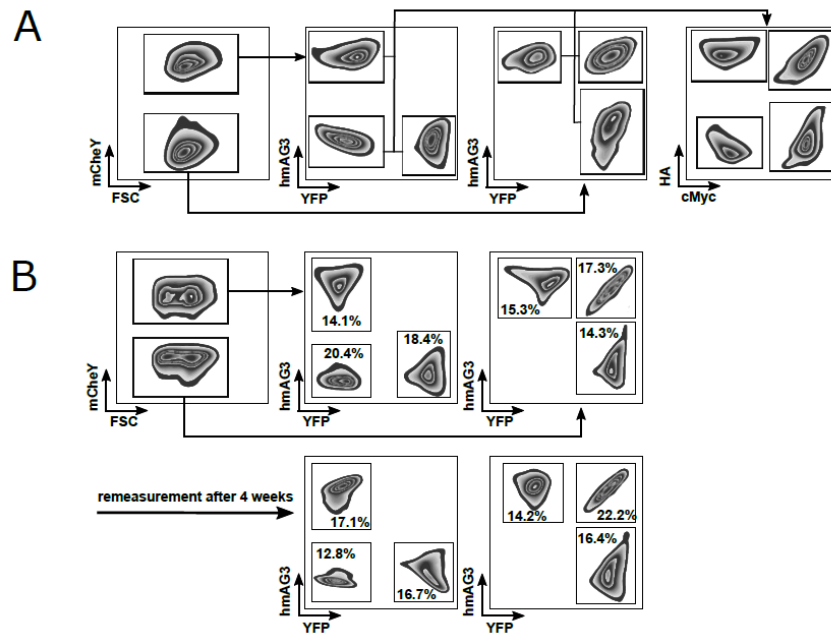

**Figure S1: Gating strategies for the 6xFGB and 24xFGB vector system. (A)** Gating strategy for 24xFGB multiplexing flow cytometry experiments. First cells are gated by mCheY expression. mCheY+ cells are further divided in mCheY+/ YFP+, mCheY+/ hmAG3+ or mCheY+ populations. mCheY- cells are divided in hmAG3+, YFP+ and hmAG3+/ YFP+ populations. Each of these six populations can be subdivided by surface marker expression HA and cMyc (HA+/cMyc+, HA+/ cMyc-, HA-, cMyc+, HA-, cMyc-) to give a total of 24 distinguishable populations. **(B)** Gating strategy for multiplex competitive proliferation assays using the 6xFGB vector system. First cells are gated by mCheY expression. mCheY+ cells are further divided in mCheY+/ YFP+, mCheY+/ hmAG3+ or mCheY+ populations. mCheY- cells are divided in hmAG3+, YFP+ and hmAG3+/ YFP+ populations. Each population size is determined by percentage of grandparent (total living cells). After a fixed timepoint the same sample is measured again. Comparing the relative population size changes over multiple timepoints allows for a detailed analysis of growth advantages or disadvantages of each population.

Supplementary Figure S2

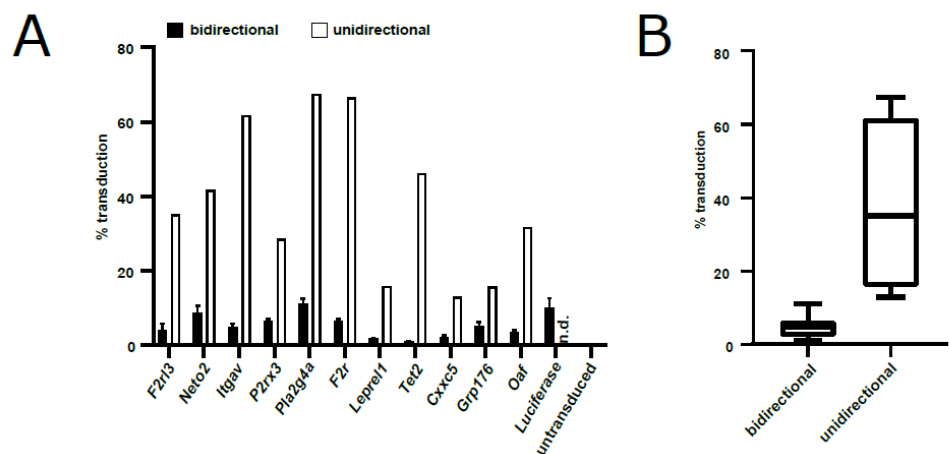

**Figure S2: Comparison of transduction efficiencies.** (A) Transduction efficiency comparison of unidirectional and bidirectional vectors. Bar graph shows direct comparison of corresponding vectors (mean  $\pm$  SD, unidirectional  $n = 1$ , bidirectional  $n = 3$ ). In addition to our 9 sgRNAs with recombination efficiencies  $>50\%$ , we also included Gpr176 (recombination efficiency  $>40\%$ ) as well as sgRNAs against Tet2 and luciferase as positive and negative controls, respectively to obtain a total of 12 constructs. (B) Boxplot graph comparing pooled unidirectional and bidirectional vector transduction efficiency. The upper limit, center and lower limit of each box denotes the upper quartile, median and lower quartile, respectively. Whiskers representing min and max recombination samples.

Supplementary Figure S3

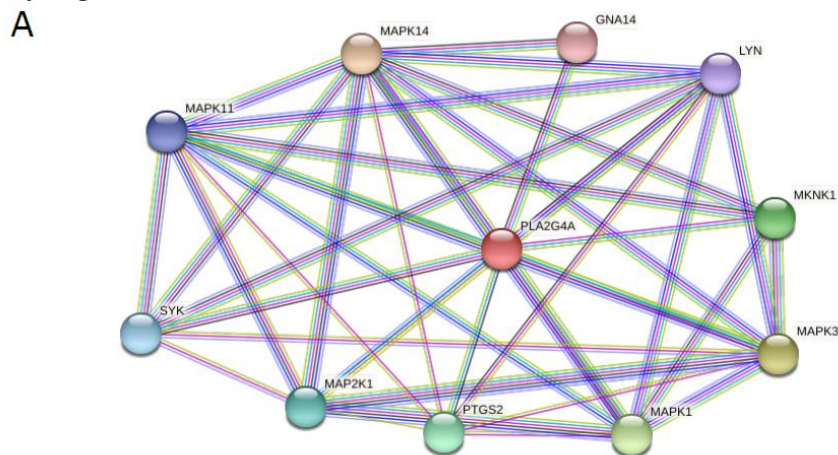

**Figure S3: Protein-protein interaction networks of PLA2G4A.** The string analysis depicts the ten most connected PLA2G4A interaction partners with prominent members of the MAPK family. Each string represents protein-protein associations of known or predicted interactions. The STRING score for predicted functional partners of PLA2G4A was calculated (MAPK14 = 0.971, MAPK3 = 0.969, MAPK1 = 0.968, MKNK1 0.951, PTGS2 = 0.946, MAP2K1 = 0.936, SYK = 0.934, MAPK11 = 0.928, LYN = 0.925, GNA14 = 0.923). The figure was generated with <https://string-db.org/>.

## Supplementary Figure S4

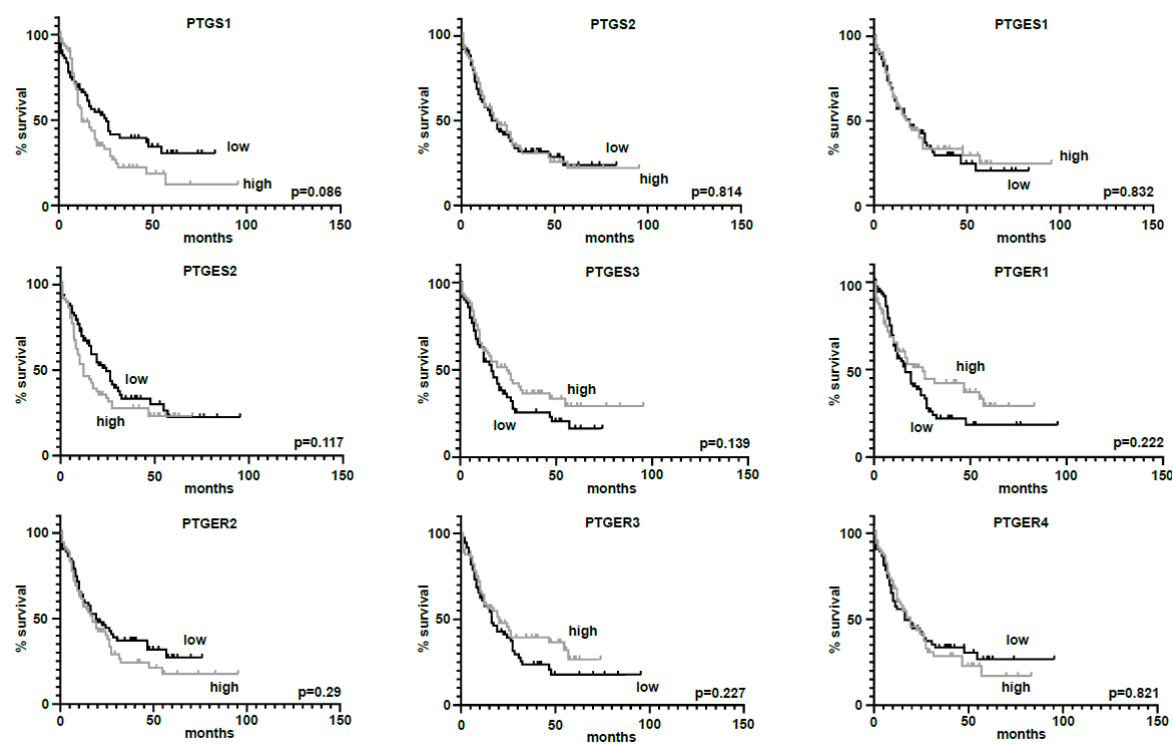

**Figure S4: Prognostic potential of members of the PGE<sub>2</sub> synthesis and receptor pathway.** Kaplan-Meier survival curve of overall survival in AML patients with above median gene expression compared to patients with below median gene expression (n = 121).

## Supplementary Tables

| Entrez.<br>GeneID | Gene.<br>Symbol | shRNA.<br>ID     | Primer_Name      | Primer_Sequence                                                         |
|-------------------|-----------------|------------------|------------------|-------------------------------------------------------------------------|
| 18783             | Pla2g4a         | Pla2g4a.<br>2357 | Pla2g4a.2357_FW  | AGCGAAAGCAAGAAAATTCTTCAATATAGTGAA<br>GCCACAGATGTATATTGAAGAATTTCTTGCTTC  |
|                   |                 |                  | Pla2g4a.2357_REV | GGCAGAAGCAAGAAAATTCTTCAATATACATCT<br>GTGGCTTCACTATATTGAAGAATTTCTTGCTTT  |
| 18783             | Pla2g4a         | Pla2g4a.<br>1738 | Pla2g4a.1738_FW  | AGCGCCCAGATGAATTTGAACGAATATAGTGAA<br>GCCACAGATGTATATTCGTTCAAATTCATCTGGA |
|                   |                 |                  | Pla2g4a.1738_REV | GGCATCCAGATGAATTTGAACGAATATACATCT<br>GTGGCTTCACTATATTCGTTCAAATTCATCTGGG |

**Supplementary Table S1: shRNA-primer sequences.** shRNAs were selected using the <https://felixfadams.shinyapps.io/miRN/> online tool prior to the ligation of double stranded oligonucleotides into the lentiviral miR-N backbone.

| Gene       | location | target site                            | hU6-FW / REV oligo        |
|------------|----------|----------------------------------------|---------------------------|
| Prdm5      | Exon 1   | GTTCGCCCTGAAGTCGTCCC <u><b>GGG</b></u> | CACCGTTCGCCCTGAAGTCGTCCC  |
|            |          |                                        | AAACGGGACGACTTCAGGGCGAAC  |
| Cand2      | Exon 2   | GGATGAGGACAGCGAGCGTA <u><b>AGG</b></u> | CACCGGATGAGGACAGCGAGCGTA  |
|            |          |                                        | AAACTACGCTCGCTGTCCTCATCC  |
| F2rl3      | Exon 2   | AATTTGCCCGGGTAGCCTCG <u><b>TGG</b></u> | CACCgAATTTGCCCGGGTAGCCTCG |
|            |          |                                        | AAACCGAGGCTACCCGGGCAAATTC |
| F2r        | Exon 1   | GCGACGATCAGCAAGCGCCG <u><b>GGG</b></u> | CACCGCGACGATCAGCAAGCGCCG  |
|            |          |                                        | AAACCGGCGCTTGCTGATCGTCGC  |
| Calcr1     | Exon 7   | TGCTGGAATGACGTTGCAGC <u><b>AGG</b></u> | CACCgTGCTGGAATGACGTTGCAGC |
|            |          |                                        | AAACGCTGCAACGTCATTCCAGCAC |
| Cxxc5      | Exon 2   | CAGTTGATGCGCCGCCGGCA <u><b>GGG</b></u> | CACCgCAGTTGATGCGCCGCCGGCA |
|            |          |                                        | AAACTGCCGGCGGCGCATCAACTGC |
| Oaf        | Exon 3   | TCAGCCTGCCGCACTGCGCG <u><b>GGG</b></u> | CACCgTCAGCCTGCCGCACTGCGCG |
|            |          |                                        | AAACCGCGCAGTGCGGCAGGCTGAC |
| Itgav      | Exon 2   | GTGAATGCTCATCCAGCCGC <u><b>CGG</b></u> | CACCGTGAATGCTCATCCAGCCGC  |
|            |          |                                        | AAACGCGGCTGGATGAGCATTCAC  |
| Pla2g4a    | Exon 4   | CAAAGGTCTCATTCACACG <u><b>GGG</b></u>  | CACCgCAAAGGTCTCATTCACACG  |
|            |          |                                        | AAACCGTGTGGAATGAGACCTTTGC |
| Neto2      | Exon 4   | GTCAGCTCTATTCGTTGACG <u><b>AGG</b></u> | CACCGTCAGCTCTATTCGTTGACG  |
|            |          |                                        | AAACCGTCAACGAATAGAGCTGAC  |
| P2rx3      | Exon 2   | GGCCGTGTCCCGCACTTGGT <u><b>AGG</b></u> | CACCGGCCGTGTCCCGCACTTGGT  |
|            |          |                                        | AAACACCAAGTGCGGGACACGGCC  |
| Gucyl1a3   | Exon 5   | CGAAGCGGGGATCACTAGCG <u><b>AGG</b></u> | CACCgCGAAGCGGGGATCACTAGCG |
|            |          |                                        | AAACCGCTAGTGATCCCCGCTTCGC |
| Leprel1    | Exon 3   | GTATAAAGGTGGTCTTTACG <u><b>AGG</b></u> | CACCGTATAAAGGTGGTCTTTACG  |
|            |          |                                        | AAACCGTAAAGACCACCTTTATAC  |
| Ednra      | Exon 2   | CACCCATCGACCCCCTAATT <u><b>TGG</b></u> | CACCgCACCCATCGACCCCCTAATT |
|            |          |                                        | AAACAATTAGGGGGTCGATGGGTGC |
| Gpr176     | Exon 1   | GGCGCCAACCTCAGCGCGTT <u><b>CGG</b></u> | CACCGGCGCCAACCTCAGCGCGTT  |
|            |          |                                        | AAACAACGCGCTGAGGTTGGCGCC  |
| Tet2 ctrl  | Exon3    | GAACAAGCTCTACATCCCGT <u><b>AGG</b></u> | CACCGAACAAGCTCTACATCCCGT  |
|            |          |                                        | AAACACGGGATGTAGAGCTTGTTTC |
| Luciferase |          | AGTTCACCGGCGTCATCGTC <u><b>GGG</b></u> | CACCGAGTTCACCGGCGTCATCGTC |
|            |          |                                        | AAACGACGATGACGCCGGTGAATC  |

**Supplementary Table S2: sgRNA target and primer sequences.** Optimized sgRNAs were selected with the help of the CCTop (<https://cctop.cos.uni-heidelberg.de:8043/>) online tool. The table shows the location of each target site within the corresponding gene, the target site sequence including the protospacer adjacent motif (PAM; underlined and bold) as well as the two oligonucleotides for annealing and ligation together with a human U6 promoter fragment into the FGB vector vector backbone.
